# Supplementary material
Source: Springer Nature journal article supplement (https://www.springermedizin.de/resource/supplementary/12905_2010_220_MOESM4_ESM.pdf/9518330)

% compliance with STARD

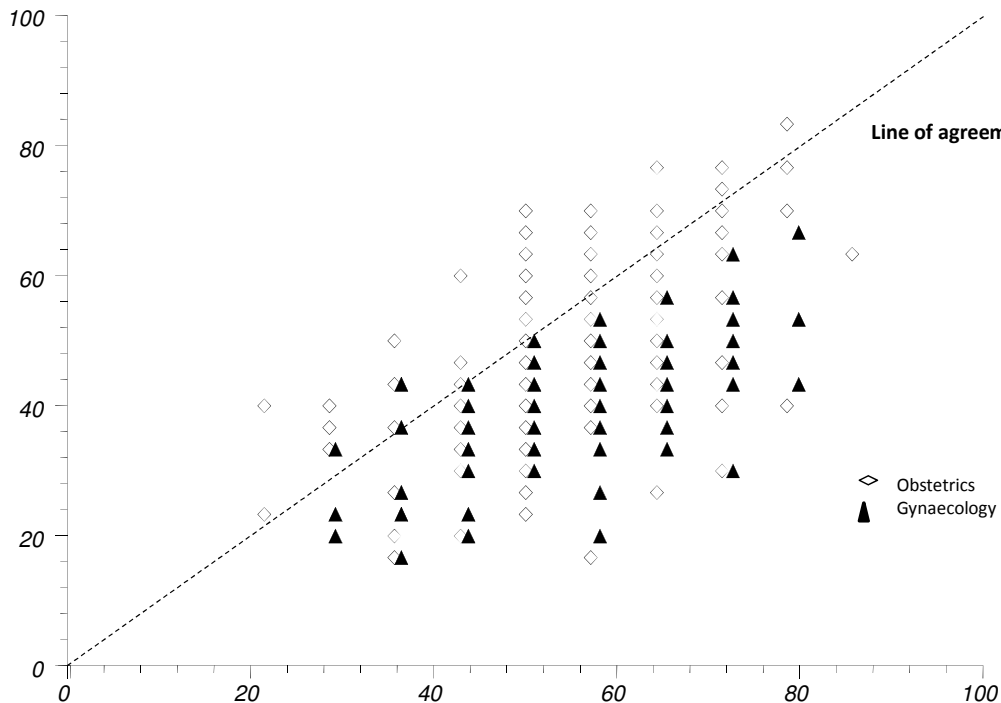

Line of agreement

◇ Obstetrics  
▲ Gynaecology

% compliance with QUADAS

Supplement: MOESM4 [file 9518330]
